# Supplementary material for: Characterization of Sugar Reduction in Model Confectionary Gels Using Descriptive Analysis
Source: MDPI journal article supplement (doi:10.3390/gels8100644), 2022-10-11
Supplement: s1 [file s1]

**Table S1.** Instrumental and Sensorial Definitions of Texture Profile Analysis (TPA) parameters [12,31,46]

| Parameter      | Instrumental Definition                                                                                                           | Sensory Definition                                                                                           |
|----------------|-----------------------------------------------------------------------------------------------------------------------------------|--------------------------------------------------------------------------------------------------------------|
| Hardness       | The peak force during the first compression cycle                                                                                 | Force required to compress food between the molars                                                           |
| Springiness    | The height that the food recovers during the time that elapses between the end of the first bite and the start of the second bite | The extent to which a compressed food returns to its original shape                                          |
| Adhesiveness   | the negative force area for the first bite representing the work necessary to pull the plunger away from the food sample          | The work required to pull the food away from the mouth during the eating process                             |
| Cohesiveness   | the ratio of positive force area during the second compression portion to that during the first compression (Area 2/Area1)        | The strength of the internal bonds making up the food; the degree a substance is compressed before it breaks |
| Fracturability | The force at the first significant break in the curve                                                                             | The force at which the material fractures, crumbles, cracks or shatters                                      |
| Chewiness      | The product of gumminess and springiness                                                                                          | The energy required to chew a solid food until it is ready for swallowing                                    |
| Gumminess      | The product of hardness and cohesiveness                                                                                          | The energy required to disintegrate a semisolid food so that it is ready for swallowing                      |
